1 **Human papillomavirus type 16 circular RNA is barely detectable for the claimed**  
2 **transformation activity**

3 Lulu Yu<sup>1</sup> & Zhi-Ming Zheng<sup>1\*</sup>

4 <sup>1</sup> Tumor Virus RNA Biology Section, HIV Dynamics and Replication Program, Center for  
5 Cancer Research, National Cancer Institute, Frederick, MD, 21702, USA.

6 \*Correspondence: Zhi-Ming Zheng, [zhengt@exchange.nih.gov](mailto:zhengt@exchange.nih.gov); Tel: 301-846-7634

7

8

9

10

11

12

13

14

15

16

17

18

19

20 **Arising from** Zhao et al. *Nature Communications* [https://doi.org/10.1038/s41467-019-](https://doi.org/10.1038/s41467-019-10246-5)  
21 10246-5 (2019).

22 The human papillomavirus type 16 (HPV16) E7 oncoprotein plays an essential role in  
23 cervical carcinogenesis and is encoded predominantly by a viral E6\*1 mRNA through  
24 alternative RNA splicing of a p97 promoter-transcribed bicistronic E6E7 pre-mRNA.  
25 Recently, Zhao et al. detected the HPV16 circular RNA circE7, which is generated  
26 aberrantly through backsplicing of the E6E7 pre-mRNA from two HPV16-positive  
27 cervical cancer cell lines, CaSki and SiHa. Based on their findings that HPV16 E7 was  
28 translated from circE7 and knockdown of circE7 in CaSki cells led to reduction of E7  
29 oncoprotein, cell proliferation, and xenograft tumor formation, the authors claimed that  
30 circE7 is functionally important in cell transformation. We believe, however, that the  
31 reported circE7 function is overstated. We found that circE7 in CaSki cells is only 0.4  
32 copy per cell and determine that the claimed circE7 function in the published report was  
33 resulted from off-targeting viral E7 linear mRNAs by their circE7 small interfering RNAs.

34

35

36

37

38

39

40 High-risk HPVs utilize a major early promoter to transcribe early transcripts for  
41 translation of different early proteins by alternative RNA splicing<sup>1,2</sup>. The viral E6 and E7  
42 oncoproteins are responsible for disrupting cell cycle control and promoting cell  
43 proliferation and transformation activities of high-risk HPVs through interactions with  
44 multiple cellular factors<sup>3,4</sup> and regulation of expression of non-coding RNAs<sup>5,6</sup>. However,  
45 production of E6 and E7 proteins is dependent on alternative splicing of the bicistronic  
46 E6E7 pre-mRNAs, and this RNA splicing is extremely efficient in HPV16- and HPV18-  
47 positive cervical cancer cells<sup>7-10</sup>. As shown in Fig.1a, HPV16 E6 and E7 are transcribed  
48 from the same early promoter P97 as a single bicistronic E6E7 transcript containing  
49 three exons and two introns, with intron 1 in the E6 open reading frame (ORF) bearing  
50 one splice donor (SD) at nucleotide (nt) 226 and two alternative splice acceptor (SA)  
51 sites, one at nt 409 and the other at nt 526, and intron 2 in the E1 ORF starting from an  
52 SD site at nt 880 in the HPV16 genome. Only the intron 1-retained E6E7 RNA has an  
53 intact E6 ORF and thus is capable of translating full-length E6 protein, but this RNA  
54 translates no or very little E7 due to intercistronic space restriction, of which the E6 stop  
55 codon is separated from the E7 start codon by only 2 nt. This limited intercistronic space  
56 prevents the translating ribosome from re-initiating translation of the downstream E7  
57 ORF after stopping E6 translation. We have previously demonstrated that the HPV16  
58 major spliced isoform E6\*I RNA functions as E7 mRNA for production of E7 protein  
59 because the intron 1 splicing from nt 226 to nt 409 introduces a premature stop codon  
60 downstream of the splice junction, which thereby increases the intercistronic distance to  
61 145 nt between the E6\*I stop codon UAA and the E7 initiation codon AUG<sup>7-9</sup>. This  
62 phenomenon also applies to HPV18 E7 production<sup>10</sup>.

63 All introns in a pre-mRNA are spliced in 5' SD to 3' SA order as an intermediate  
64 circular lariat RNA<sup>9,10</sup>. Occasionally, RNA backsplicing from a downstream intron 5' SD  
65 to an upstream intron 3' SA over the exon(s) could occur, producing circRNAs  
66 containing the exon(s)<sup>11</sup>. Efficiency of RNA backsplicing to produce circRNAs is very  
67 low and may account for <1% of normal linear RNA splicing<sup>12,13</sup>. In the original article,  
68 Zhao et al. detected circE7 from the backsplicing of HPV16 E6E7 mRNAs in CaSki and  
69 SiHa cells and in cervical tissue samples (Fig.1a, lower right). The authors found that  
70 circE7 could translate E7 protein and knocking down circE7 expression by short hairpin  
71 RNAs (shRNAs) targeting to the backsplice junction in CaSki cells led to reduction of E7  
72 protein expression and subsequent cell proliferation or xenograft tumor formation.  
73 However, this article is hard to follow because of mislabeled figure panels  
74 (Supplementary Figs. 2b, 2c, 4a, 5a, and 5b), a missing figure legend (Supplementary  
75 Fig. 5f), no size markers for RT-PCR products (Figs. 1d, 2b, 2e, 3g, 5d, and 5e and  
76 Supplementary Figs. 2c, 3c, and 3g) and Northern blots (Supplementary Figs. 2b and  
77 4b), misuse of the circE7 g-block sequence which had four, including E7, AUG  
78 mutations as a wild-type circE7 (supplementary data 2), and lack of suitable controls. In  
79 addition, the authors utilized unconventional HPV16 genome positions to describe their  
80 circE7 production and viral RNA splicing. We had to align their HPV16 genome  
81 positions to an HPV16 reference genome from the papillomavirus database PAVE  
82 (<http://pave.niaid.nih.gov>) in order to understand how their studies were designed and  
83 performed.

84 We have been studying the RNA splicing of both HPV16 and HPV18 E6E7 pre-  
85 mRNAs<sup>7-10,14-16</sup>. We recently quantified by ddPCR the copy number of HPV16 E6\*1,

86 E6\*II, and circE7 in CaSki cells using human Inc-FANCI-2 with a known RNA copy  
87 number per CaSki cell<sup>6</sup> as a reference RNA and found only 0.4 copy of circE7 per  
88 CaSki cell, which is ~1640-fold less than E6\*I mRNAs (Fig. 1b). The number of E6\*I  
89 transcripts in CaSki cells is ~10 times higher than E6\*II as we reported<sup>15</sup>. Although the  
90 circE7 RNA produced from backsplicing is 472 nt long, the detected circE7 products  
91 from RT-PCR with an inverse primer pair used in our study was about 351 nt and  
92 appeared not to be enriched by RNase R treatment (Supplementary Fig. 1a).  
93 Approximate 500 ng of total cDNA and 40 cycles of inverse PCR were applied to detect  
94 circE7 because of its extremely low abundance in CaSki cells (Supplementary Fig. 1a)  
95 and two W12 subclone cell lines (Supplementary Fig. 1b), when compared for detection  
96 of HPV16 E6\*I and E6\*II RNAs (Supplementary Fig. 1a). The RT-PCR products were  
97 confirmed as circE7 by Sanger sequencing. Although Zhao et al. claimed detection of  
98 circE7 by Northern blot analysis using an RT-PCR product as a probe, lack of further  
99 verification of the reported Northern blot band (~700 nt), larger than its predicted size,  
100 indicated that this entity might not be authentic.

101 We further showed that the detected E6\*I and circE7 in CaSki cells are both  
102 cytoplasmic by cell fractionation analysis (Fig. 1c-d). As expected, the level of circE7  
103 RNA in the cytoplasm is negligible when compared to E6\*I (Fig.1d). The majority of  
104 HPV16 early transcripts and spliced RNA isoforms have been identified in the  
105 cytoplasm by cell fractionation and Northern blot analysis<sup>14</sup>. Surprisingly, Zhao et al.  
106 found viral linear E7 RNA was detected predominantly in the nuclear fraction by SYBR  
107 green RT-qPCR both in CaSki cells and in E6E7 minigene transfected HEK293T cells  
108 (Zhao et al., Fig. 3b). We analyzed their primer sequences and found that the primer

109 pair detected only less abundant intron 1-containing E6 RNA or most likely the nuclear  
110 E6E7 pre-mRNAs, but not the predominant E6\*I RNAs in CaSki cells. It is also hard to  
111 determine the exact amount of linear E7 RNA that was expressed from each minigene  
112 in HEK293 cells by SYBR green RT-qPCR, as everything in the report was shown as a  
113 ratio and only the circE7 RNA was displayed by inverse PCR and in Northern blots  
114 (Zhao et al., Fig. 3a). Unless a complete expression profile is provided, it will be difficult  
115 to verify that the detected E7 protein was only translated from circE7, not from linear E7.  
116 In fact, addition of the QKI binding site to facilitate the circulation of E7 RNA only  
117 enhanced production of circE7 by two-fold (Zhao et al., Supplementary Fig. 3c). We  
118 also question why two siRNAs targeting the linear E7 RNA expressed from the  
119 minigenes led to its reduction by  $\geq 75\%$  (Zhao et al., Supplementary Fig. 3e) but did not  
120 decrease the expression of FLAG-E7 protein (Zhao et al., Fig. 2c). Clearly, the authors  
121 imply that their linear E7 RNAs somehow did not translate E7 protein. We found that the  
122 circE7 g-block sequence used in the authors' study as a wild-type circE7 had four,  
123 including E7, AUG mutations (Zhao et al., Supplementary data 2).

124 We then investigated how circE7 RNA at 0.4 copy per CaSki cell could exhibit  
125 the high impact on E7 production and activities in cell proliferation and xenograft tumor  
126 formation reported by Zhao et al. We designed two siRNAs targeting the backsplice  
127 junction of HPV16 circE7 (Fig. 1e), with si-circE7-2 being the same circE7-sh2  
128 sequence in the authors' study. After delivery of the siRNAs to CaSki cells, we found  
129 both si-circE7-1 and si-circE7-2 could knock down circE7 expression by ~75-80%, but  
130 si-circE7-1 also reduced E6\*I and E6\*II expression by 30-35% and si-circE7-2, which is  
131 2 nt longer than si-circE7-1, decreased E6\*I and E6\*II expression up to 60%, whereas

132 si-E7 targeting to the E7 ORF region<sup>8</sup> inhibited ~70% expression of E6\*I, E6\*II, and  
133 circE7 (Fig. 1f). We also found that all three siRNAs affected the expression of viral E6  
134 RNAs by 15-20% (Supplementary Fig. 2). Splicing profile analysis by RT-PCR and  
135 agarose gel electrophoresis confirmed the siRNA knockdown effects on both circE7 and  
136 E6\*I RNAs (Fig. 1g). Western blot analysis of the siRNA-treated CaSki cells further  
137 confirmed these three siRNA-mediated reductions of E7 protein expression in the order  
138 of si-E7 > si-circE7-2 > si-circE7-1 (Fig. 1h). The data are striking because we found  
139 that si-circE7-2 with 13-nt sequence overhang to the backsplice junction had a bigger  
140 off-target effect on linear E6\*I and E6\*II RNAs than si-circE7-1 with the 11-nt overhang  
141 sequence. Although Zhao et al. claimed that their shRNAs had no effects on linear  
142 E6/E7 or E6\*I RNAs in CaSki cells, lack of an internal RNA loading control and probe  
143 information in the Northern blot (Zhao et al., Supplementary Fig. 4b) and miscalculation  
144 of circE7 shRNAs on E6\*I expression by unusual normalization to  $\beta$ -actin in the SYBR  
145 green RT-qPCR (Zhao et al., Supplementary Fig. 4c) raised a red flag for their data  
146 interpretation. As the authors' shRNA study can't unequivocally prove E7 protein  
147 production only from circE7 at 0.4 copy per CaSki cell and their data conflict from our  
148 results, we believe that their claim of circE7 function in production of E7 protein and E7  
149 activities was attributable to the off-target effects of their si-circE7s.

## 150 **Acknowledgements**

151 This study was supported by the Intramural Research Program of the National Institutes  
152 of Health, National Cancer Institute, Center for Cancer Research. We thank Anne Arthur  
153 for proofreading and other members of the Zheng lab for comments and suggestions.

## 154 **Author contributions**

155 L.Y. and Z.M.Z designed the study, performed all data analyses/interpretations, and  
156 wrote the manuscript.

### 157 **Competing interests**

158 The authors declare no competing interests.

### 159 **Data availability statement**

160 All the data in the manuscript is available upon request.

### 161 **References**

- 162 1. Zheng, Z. M. & Baker, C. C. Papillomavirus genome structure, expression, and  
163 post-transcriptional regulation. *Front Biosci.* 11, 2286-2302 (2006).
- 164 2. Johansson, C. & Schwartz, S. Regulation of human papillomavirus gene  
165 expression by splicing and polyadenylation. *Nat. Rev. Microbiol.* 11, 239-251 (2013).
- 166 3. Vande Pol, S. B. & Klingelutz, A. J. Papillomavirus E6 oncoproteins. *Virology*  
167 445, 115-137 (2013).
- 168 4. Roman, A. & Munger, K. The papillomavirus E7 proteins. *Virology* 445, 138-168  
169 (2013).
- 170 5. Wang, X. et al. microRNAs are biomarkers of oncogenic human papillomavirus  
171 infections. *Proc. Natl. Acad. Sci. U. S. A* 111, 4262-4267 (2014).
- 172 6. Liu, H. et al. Oncogenic HPV promotes the expression of the long noncoding  
173 RNA Inc-FANCI-2 through E7 and YY1. *Proc. Natl. Acad. Sci. USA* 118, e2014195118  
174 (2021).
- 175 7. Zheng, Z. M. et al. Splicing of a cap-proximal human papillomavirus 16 E6E7  
176 intron promotes E7 expression, but can be restrained by distance of the intron from its  
177 RNA 5' cap. *J. Mol. Biol.* 337, 1091-1108 (2004).
- 178 8. Tang, S. et al. The E7 oncoprotein is translated from spliced E6\*I transcripts in  
179 high-risk human papillomavirus type 16- or type 18-positive cervical cancer cell lines via  
180 translation reinitiation. *J. Virol.* 80, 4249-4263 (2006).
- 181 9. Ajiro, M. et al. Intron definition and a branch site adenosine at nt 385 control RNA  
182 splicing of HPV16 E6\*I and E7 expression. *PLoS One* 7, e46412 (2012).
- 183 10. Brant, A. C. et al. HPV18 utilizes two alternative branch sites for E6\*I splicing to  
184 produce E7 protein. *Virol. Sin.* 34, 211-221 (2019).



- 185 11. Li, X. et al. The biogenesis, functions, and challenges of circular RNAs. *Mol. Cell*  
186 71, 428-442 (2018).
- 187 12. Pasman, Z. et al. Exon circularization in mammalian nuclear extracts. *RNA* 2,  
188 603-610 (1996).
- 189 13. Barrett, S. P. et al. Circular RNA biogenesis can proceed through an exon-  
190 containing lariat precursor. *Elife* 4, e07540 (2015).
- 191 14. Jia, R. et al. Control of the papillomavirus early-to-late switch by differentially  
192 expressed SRp20. *J. Virol.* 83, 167-180 (2009).
- 193 15. Ajiro, M. & Zheng, Z. M. E6<sup>Δ</sup>E7, a novel splice isoform protein of human  
194 papillomavirus 16, stabilizes viral E6 and E7 oncoproteins via HSP90 and GRP78. *mBio*  
195 6, e02068-14 (2015).
- 196 16. Ajiro, M. et al. Serine/arginine-rich splicing factor 3 and heterogeneous nuclear  
197 ribonucleoprotein A1 regulate alternative RNA splicing and gene expression of human  
198 papillomavirus 18 through two functionally distinguishable cis elements. *J. Virol.* 90,  
199 9138-9152 (2016).

200

## 201 **Figure legend**

202 **Fig. 1** Characterization of HPV16 circE7 expression in CaSki cells. **a** Structure diagram  
203 of viral early promoter p97-derived bicistronic HPV16 E6E7 pre-mRNA and its splicing  
204 profiles in CaSki cells. Shown on the pre-mRNA are E6, E7, and partial E1 ORF, and  
205 genomic positions of viral splice donor (SD) and splice acceptor (SA) sites. Below the  
206 pre-mRNA are two spliced isoforms (E6\**I* and E6\**II*) from alternative RNA splicing  
207 commonly detected in CaSki cells and a barely detectable circE7 from backsplicing.  
208 Paired arrows below the pre-mRNA and on circE7 RNA were used for detection of  
209 individual products from viral RNA splicing in CaSki cells. Horizontal bars above the  
210 backsplice junctions and below the E7 ORF are siRNAs used to target circE7 (si-circE7-  
211 1 and -2) and the corresponding RNA isoforms containing the E7 ORF region in this  
212 study. **b** RNA copy number of HPV16 E7 (E6\**I* and E6\**II*) and circE7 in CaSki cells  
213 determined by ddPCR. Total cell RNA was reverse transcribed and serially diluted in

214 triplicate before ddPCR analysis, with long noncoding RNA Inc-FANCI-2 serving as the  
215 internal reference RNA control. **c** and **d** HPV16 E7 (E6\*I) and circE7 RNAs in CaSki  
216 cells are predominantly cytoplasmic. Nuclear and cytoplasmic fractionation efficiency  
217 was determined by Western blot analysis of nuclear protein SRSF3 and cytoplasmic  
218 GAPDH protein (**c**) and by RT-qPCR analysis of nuclear MALAT1 and cytoplasmic  
219 GAPDH RNA (**d**). E7 (E6\*I) and circE7 RNAs in nuclear and cytoplasmic fractions were  
220 determined by RT-qPCR (**d**). Data are mean  $\pm$  SE of six repeats. **e** Nucleotide  
221 sequences of two synthetic siRNAs targeting the circE7 backsplice junction. **f**, **g**, and **h**  
222 HPV16 circE7-specific siRNAs affect the expression of both E6\*I and E6\*II RNAs and  
223 E7 protein in CaSki cells. Cell lysates were prepared 72 h after transfection of indicated  
224 individual siRNAs. Total RNA extracted from the cells was reverse transcribed and used  
225 to quantify HPV16 E6\*I, E6\*II, and circE7 RNAs by RT-qPCR using specific TaqMan  
226 probes (**f**). Data are mean  $\pm$  SE of six repeats. \*,  $p < 0.01$  by unpaired, two-tailed  
227 Student's *t* test. The cDNAs prepared were also used to profile the effects of individual  
228 siRNAs on viral circE7 and bicistronic E6E7 RNA splicing by RT-PCR and agarose gel  
229 electrophoresis. A total of 500 ng cDNA and 40 cycles of PCR reactions were used to  
230 detect circE7, and 100 ng of cDNA and 25 cycles of PCR reactions were used to detect  
231 the common spliced products of E6E7 and cellular GAPDH pre-mRNAs. GAPDH served  
232 as the RNA loading control. The relative E6\*I RNA level was quantified after normalizing  
233 to GAPDH in each sample (**g**). Total cell lysates were also immunoblotted for E7 protein  
234 expression by an anti-HPV16 E7 antibody. The relative E7 level in each sample was  
235 quantified after normalizing with  $\beta$ -tubulin serving as the protein loading control (**h**).

236

237 **Supplementary information**

238 **Methods**

239 **Cell lines and siRNAs.** HPV16-positive cervical cancer cell line CaSki was obtained  
240 from ATCC (Manassas, VA). CaSki cells were maintained in Dulbecco's modified  
241 Eagle's medium (DMEM; Thermo Fisher Scientific, Waltham, MA) with 10% fetal bovine  
242 serum (FBS; GE Healthcare, Logan, UT) at 37 °C in a 5% CO<sub>2</sub> atmosphere. HPV16-  
243 positive W12 subclone cell lines 20861 (integrated HPV16 genome) and 20863  
244 (episomal HPV16 genome) were a gift from Paul Lambert (University of Wisconsin).  
245 Individual subclones were maintained in F-medium (3:1, F-12:DMEM) supplemented  
246 with 5% FBS, 0.4 µg/ml hydrocortisone, 5 µg/ml insulin, 8.4 ng/ml cholera toxin, 10  
247 ng/ml epidermal growth factor, 24 µg/ml adenine, 100 U/ml penicillin, and 100 µg/ml  
248 streptomycin. All subclone cells were grown in the presence of irradiated 3T3-J2 feeder  
249 cells. Three custom-designed synthetic siRNAs including two specifically targeting the  
250 backsplice junction of circE7 and one targeting the open reading frame of E7  
251 (Supplementary Table 1) were designed and purchased from Dharmacon (Lafayette,  
252 CO). Non-targeting control siRNA (Dharmacon, #D-001210-01) served as the negative  
253 control. CaSki cells at 24 h of cell passage were transfected with 40 nM of siRNA by  
254 LipoJet In Vitro Transfection Kit (Ver. II, SignaGen Laboratories, Rockville, MD). Total  
255 protein extracts and total RNA were prepared 72 h after the siRNA transfection of CaSki  
256 cells. The cells were incubated with 10 µM MG-132 (#M7449, Sigma-Aldrich, St. Louis,  
257 MO) for 4 h before harvesting for protein samples.

258 **RNA preparation and RNase R treatment.** Total RNA from CaSki cells with or without  
259 siRNA treatment was extracted using TriPure reagent (#11667165001, Roche, Basel,

260 Switzerland) according to the manufacturer's protocol. Approximate 2  $\mu\text{g}$  of RNA was  
261 treated for 40 min at 37 °C by RNase R (5 U) (#RNR07250, Lucigen, Middleton, WI) in  
262 1 $\times$  RNase R buffer.

263 **Droplet digital PCR (ddPCR).** The number of HPV16 E6\*I, E6\*II, and circE7 RNA  
264 copies per cell was determined by ddPCR. Briefly,  $\sim$ 2  $\mu\text{g}$  of total RNA was reverse  
265 transcribed in a 20- $\mu\text{l}$  reaction at 50 °C with random hexamers and SuperScript® IV  
266 Reverse Transcriptase (Thermo Fisher Scientific, #18091050). The human Inc-FANCI-2  
267 RNA<sup>6</sup> with known copy number per CaSki cell was used as a reference RNA to  
268 determine the cell number. The primers and TaqMan probes in ddPCR for detection of  
269 HPV16 E6\*I, E6\*II, circE7, and Inc-FANCI-2 are listed in Supplementary Table 1. The  
270 prepared CaSki cDNA was serially diluted at 1:2, 1:20, and 1:40 with a low-EDTA TE  
271 buffer (10 mM Tris-HCl, 0.1 mM EDTA, pH=8.0), and then 1  $\mu\text{l}$  of each diluted cDNA  
272 was used in triplicate in a 20- $\mu\text{l}$  ddPCR reaction containing the specific primer pair and a  
273 TaqMan probe for specific detection of HPV16 E6\*I, E6\*II, circE7, and Inc-FANCI-2.  
274 Droplet generation (Bio-Rad QX200) and PCR (Bio-Rad T100) were performed  
275 according to the manufacturer's protocol (BioRad, Hercules, CA). The cycling protocol  
276 started with a 95 °C enzyme activation step for 10 min and followed by 40 cycles of a  
277 two-step cycling (94 °C 30 s and 60 °C 30 s at ramping rate of 2° C/s). The final  
278 extension time was 10 min at 98 °C. Bio-Rad QuantaSoft 1.5.38.1118 was used to  
279 process the data. The best dilution for circE7 detection was 1:2, while that for the other  
280 three targets was 1:40. The input cell number was determined by the level of Inc-  
281 FANCI-2. The mean HPV16 E6\*I, E6\*II, and circE7 copy number per cell was calculated  
282 from three ddPCR reactions in triplicate.

283 **RT-PCR and RT-qPCR.** Total RNA (2  $\mu$ g) was reverse-transcribed as described above.  
284 PCR amplification was performed with Platinum™ SuperFi II DNA Polymerase (Thermo  
285 Fisher Scientific, #12361010) using the primers listed in Supplementary Table 1. 500 ng  
286 of cDNA was used for circE7 detection, and the cycling protocol was shown as follows:  
287 98 °C 30 s, followed by 40 cycles of 98 °C 15 s, 55 °C 15 s, 72 °C 3 min, and the final  
288 elongation step of 72 °C 10 min. The same cDNA at 100 or 200 ng was used for linear  
289 E7 and GAPDH detection, of which the cycling protocol started with 98 °C 30 s, followed  
290 by 25 cycles of 98 °C 15 s, 55 °C 15 s, 72 °C 30 s, and the final elongation step of 72 °C  
291 10 min. The following oligo primers were used in RT-PCR: oLLY405 and oZMZ212 for  
292 HPV16 circE7, oZMZ237 and oZMZ212 for HPV16 E6E7 and spliced RNA isoforms,  
293 and oZMZ269 and oZMZ270 for human GAPDH RNA. RT-qPCR was carried out using  
294 TaqMan Gene Expression Master Mix (Thermo Fisher Scientific, #4369016) together  
295 with the specific primers on a StepOne Plus Real-Time PCR system (Applied  
296 Biosystems, Foster City, CA). The customized RT-qPCR primers and probes for HPV16  
297 E6\*I, E6\*II, and circE7 are listed in Supplementary Table 1. Human GAPDH RNA  
298 (Thermo Fisher Scientific, #Hs02758991\_g1) served as the RNA loading control.

299 **CaSki cell fractionation.** CaSki cells ( $5 \times 10^6$ ) were fractionated by using Nuclei EZ  
300 Prep Kit (Sigma-Aldrich, #NUC-101) following the manufacturer's protocol. Briefly, the  
301 cells in 10-mm dishes were rinsed with cold PBS (Thermo Fisher Scientific,  
302 #10010023), digested with 0.05% trypsin (Thermo Fisher Scientific, #25300062),  
303 quenched in DMEM medium containing 10% FBS, and then counted. The digested cells  
304 were then transferred to a 15-ml conical tube, centrifuged, and washed twice with cold  
305 PBS at 800 rpm for 10 min at 4° C. The cell pellet was transferred to a 1.5-ml Eppendorf

306 tube and suspended in 600  $\mu$ l of cold Nuclei EZ lysis buffer. Approximate 30  $\mu$ l of the  
307 total cell lysate was collected for total cell protein detection. The remaining total cell  
308 lysate was centrifuged at 500 g for 5 min at 4 °C. The supernatant was then collected  
309 for cytoplasmic protein detection and RNA extraction using TriPure (Roche). The nuclei  
310 pellet was washed with 1 ml of Nuclei EZ lysis buffer and resuspended in 300  $\mu$ l of  
311 Nuclei EZ storage buffer for nuclear protein detection and RNA extraction using TriPure  
312 (Roche). For Western blot analysis of fractionation efficiency, the fractionated cell  
313 lysates in 2x SDS loading buffer with 5% 2-ME were resolved by electrophoresis in a  
314 NuPAGE Bis-Tris 4–12% gel (Thermo Fisher Scientific) in 1x MOPS SDS buffer  
315 (Thermo Fisher Scientific) and immunoblotted for corresponding proteins by specific  
316 antibodies. The fractionated cytoplasmic and nuclear RNAs were used for detection of  
317 HPV16 E6E7 RNAs and circE7 by RT-qPCR with human GAPDH and MALAT1  
318 (Thermo Fisher Scientific, #Hs00273907\_s1) serving as controls for RNA fractionation  
319 efficiency of the cytoplasmic and nuclear RNAs.

320 **Western blot analysis.** Total cell protein for HPV16 E7 detection was prepared from 5  
321  $\times 10^6$  CaSki cells by directly lysing the cells in 300  $\mu$ l of 1x RIPA buffer (#BP-115X,  
322 Boston BioProducts, Ashland, MA) with the addition of cocktail protease inhibitors  
323 (chymotrypsin, thermolysin, papain, pronase, pancreatic extract, trypsin) (Roche,  
324 #04693159001). The cell lysate (15  $\mu$ l) was mixed with 5  $\mu$ l of 4x SDS loading buffer  
325 with addition of 5% 2-ME, heat denatured at 95° C for 10 min, and resolved by  
326 electrophoresis in a NuPAGE Bis-Tris 4–12% gel (Thermo Fisher Scientific) in 1x  
327 MOPS SDS buffer (Thermo Fisher Scientific). After transfer onto a nitrocellulose  
328 membrane, the membrane was blocked for 1 h with 5% skim milk in 1x TBS (Tris-

329 buffered saline) containing 0.05% Tween (TTBS) and incubated with a primary antibody  
330 diluted in TTBS overnight at 4° C. After three washes with 1× TTBS buffer, the  
331 membrane was then incubated with a corresponding secondary peroxidase-conjugated  
332 antibody diluted in 2% milk/TTBS for 1 h at room temperature. The specific signal on the  
333 membrane was generated with SuperSignal West Pico (Thermo Fisher Scientific) and  
334 captured by a ChemiDoc Touch imaging system (Bio-Rad). To confirm the  
335 cytoplasm/nuclear separation in CaSki cells, CaSki cells in Nuclei EZ Lysis Buffer was  
336 directly lysed in 2× SDS loading buffer with addition of 5% 2-ME; all the other  
337 procedures are the same as shown above.

338 **Antibodies used for Western blot analysis.** Rabbit polyclonal anti-HPV16 E7  
339 (#GTX133411, GeneTex, Irvine, CA), rabbit monoclonal anti-SRSF3 (#NBP2-76892,  
340 NOVUS, Littleton, CO), rabbit monoclonal anti-GAPDH (#14C10, Cell Signaling,  
341 Danvers, MD), and mouse monoclonal anti-β-tubulin (#T5201, Sigma-Aldrich) were  
342 used for Western blot analysis.

343

344 **Supplementary Table 1** DNA oligo primers, synthetic siRNA, and TaqMan probes used  
345 in the study.

346 **Supplementary Fig. 1 a** Detection of HPV16 circE7 and linear E7 in CaSki cells by  
347 RT-PCR upon RNase R treatment. RNase R (5 U)-treated total RNA was reverse  
348 transcribed in a 20 µl-reaction and 500 ng of the cDNA was then used for circE7  
349 detection in 40 cycles of PCR amplification, whereas 200 ng of the cDNA was used for  
350 E6\*I and E6\*II detection in 25 cycles of PCR amplification. **b** Detection of HPV16 circE7

351 in W12 subclone 20861 cells with an integrated HPV16 genome and subclone 20863  
352 cells with an episomal HPV16 genome by RT-PCR upon RNase R treatment. RNase R  
353 (5 U)-treated total RNA was reverse transcribed in a 20  $\mu$ l-reaction and 500 ng of the  
354 cDNA was then used for circE7 detection in 40 cycles of PCR amplification.

355 **Supplementary Fig. 2** HPV16 circE7-specific siRNAs affect the expression of HPV16  
356 E6 RNA in CaSki cells. Cell lysates were prepared 72 h after transfection of indicated  
357 siRNAs. Total RNA extracted from the cells was reverse transcribed and used to  
358 quantify HPV16 E6 RNA by RT-qPCR using an E6-specific TaqMan probe.

359



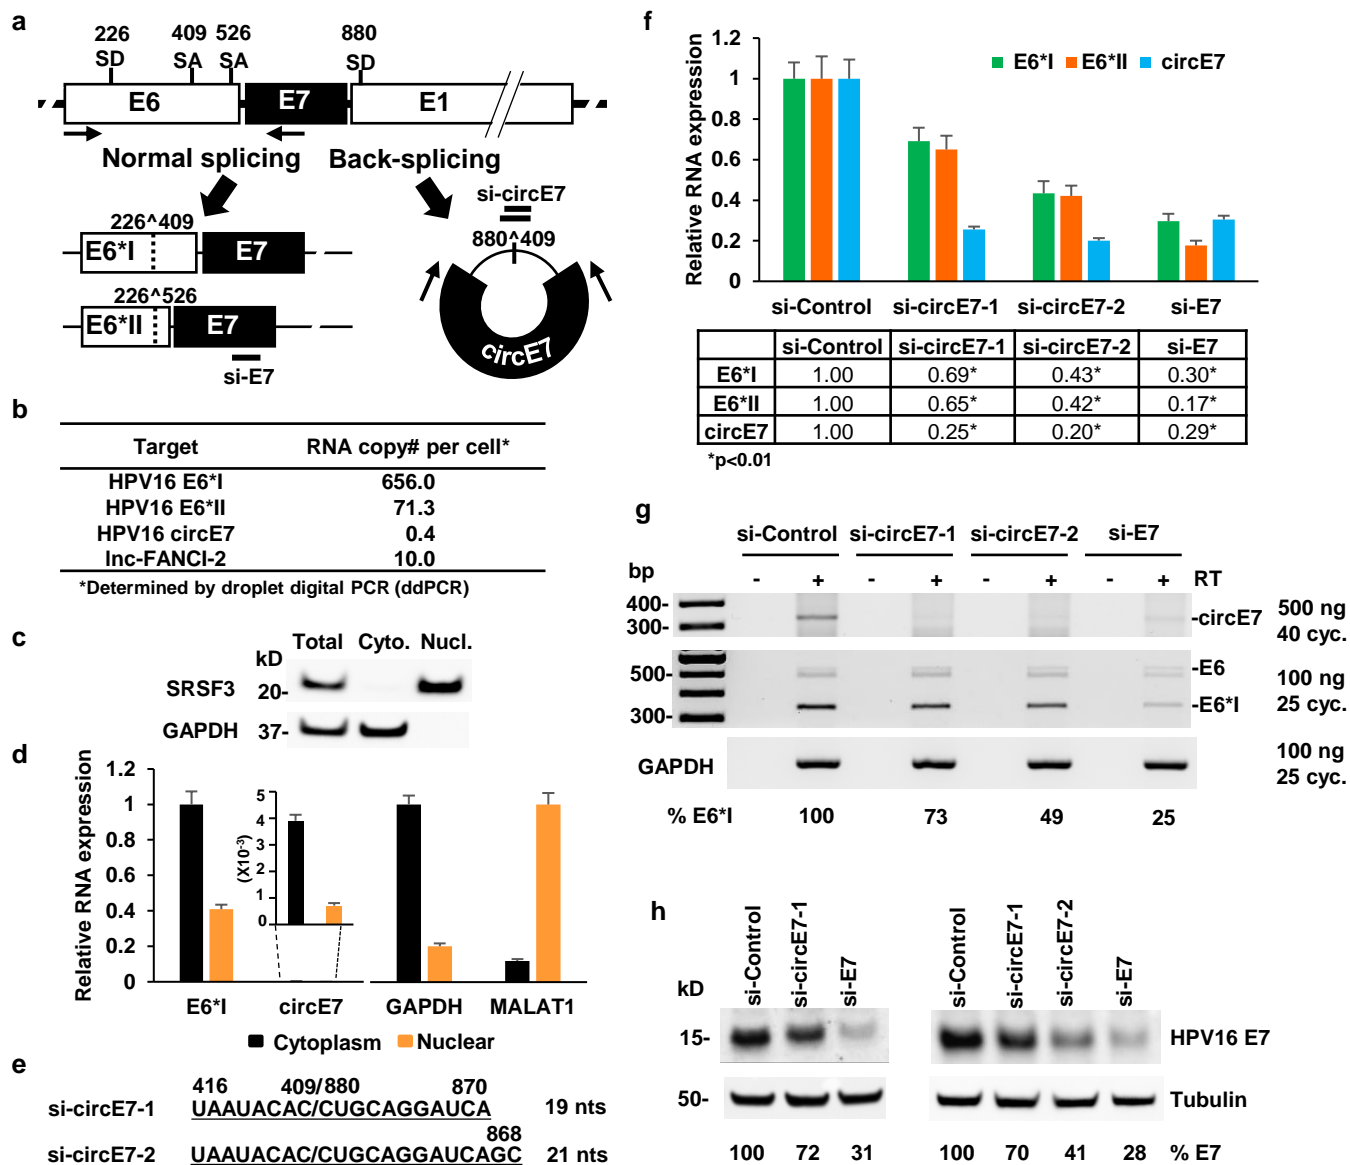

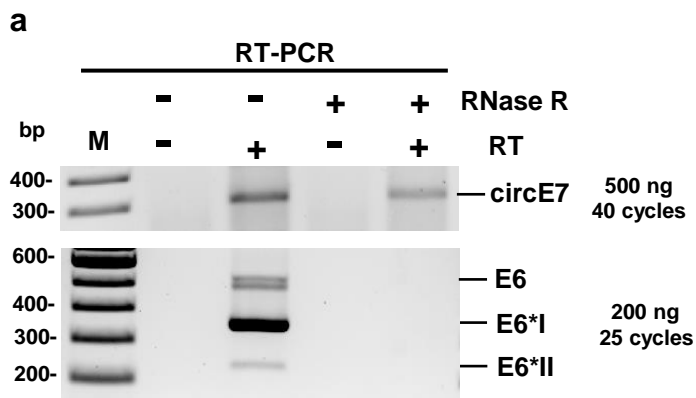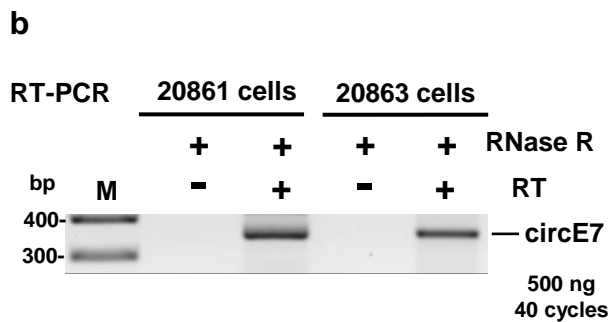

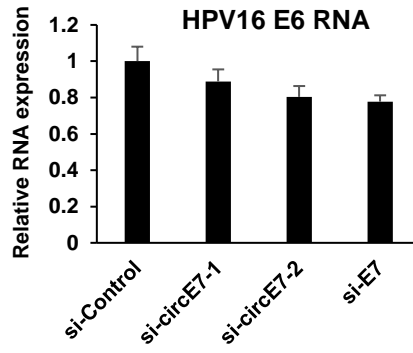

Source: http://biorxiv.org/content/10.1101/2021.09.22.449294v1.full.pdf
